# Supplementary material for: Sicker patients account for the weekend mortality effect among adult emergency admissions to a large hospital trust
Source: PubMed Central journal article supplement (PMC6560459; doi:10.1136/bmjqs-2018-008219), 2018-10-09
Supplement: bmjqs-2018-008219supp001.pdf [file bmjqs-2018-008219supp001.pdf]

ELECTRONIC SUPPLEMENTARY MATERIAL

ESM Fig 1: Mechanisms for the weekend effect

Ratio of two proportions or rates: the aggregate weekend and weekday death rates:

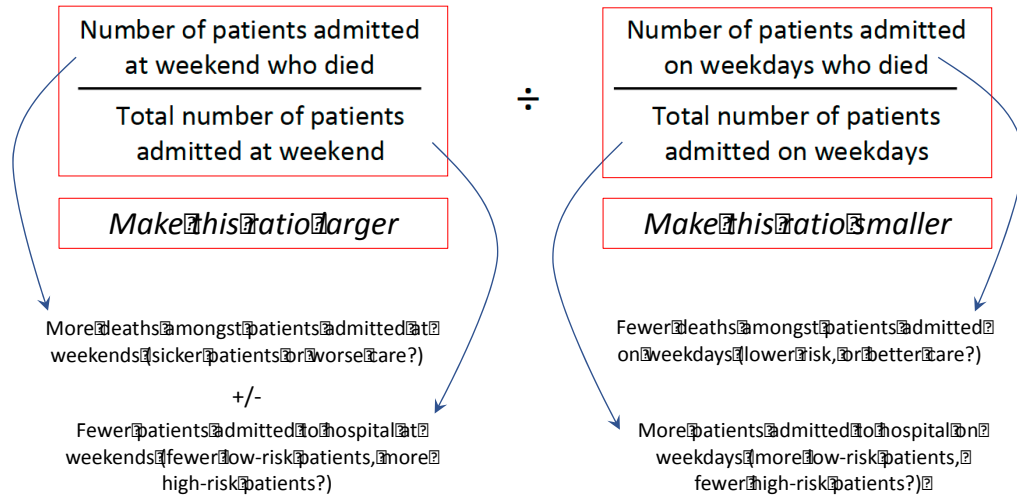

ESM Fig 2: National Early Warning Score (NEWS)\*

| PHYSIOLOGICAL PARAMETERS | 3     | 2        | 1           | 0           | 1           | 2         | 3          |
|--------------------------|-------|----------|-------------|-------------|-------------|-----------|------------|
| Respiration Rate         | ≤8    |          | 9 - 11      | 12 - 20     |             | 21 - 24   | ≥25        |
| Oxygen Saturations       | ≤91   | 92 - 93  | 94 - 95     | ≥96         |             |           |            |
| Any Supplemental Oxygen  |       | Yes      |             | No          |             |           |            |
| Temperature              | ≤35.0 |          | 35.1 - 36.0 | 36.1 - 38.0 | 38.1 - 39.0 | ≥39.1     |            |
| Systolic BP              | ≤90   | 91 - 100 | 101 - 110   | 111 - 219   |             |           | ≥220       |
| Heart Rate               | ≤40   |          | 41 - 50     | 51 - 90     | 91 - 110    | 111 - 130 | ≥131       |
| Level of Consciousness   |       |          |             | A           |             |           | V, P, or U |

\*The NEWS initiative flowed from the Royal College of Physicians' NEWS DIG, and was jointly developed and funded in collaboration with the Royal College of Physicians, Royal College of Nursing, National Outreach Forum and NHS Training for Innovation.

\*taken from National Early Warning Score (NEWS) – Standardising the assessment of acute-illness severity in the NHS, Royal College of Physicians 2012

ESM Fig 3: The NEWS trigger system aligned to the scale of clinical risk\*

| NEWS scores                                    | Clinical risk |
|------------------------------------------------|---------------|
| 0                                              | Low           |
| Aggregate 1–4                                  |               |
| RED score*<br>(Individual parameter scoring 3) | Medium        |
| Aggregate 5–6                                  |               |
| Aggregate 7 or more                            | High          |

\*taken from National Early Warning Score (NEWS) – Standardising the assessment of acute-illness severity in the NHS, Royal College of Physicians 2012

ESM Fig 4a: In-hospital crude mortality (%) and adjusted weekend admission odds ratios (± 95% CI): Effect of non-availability of NEWS, increasing NEWS band, and ICU transfer within 24 hours

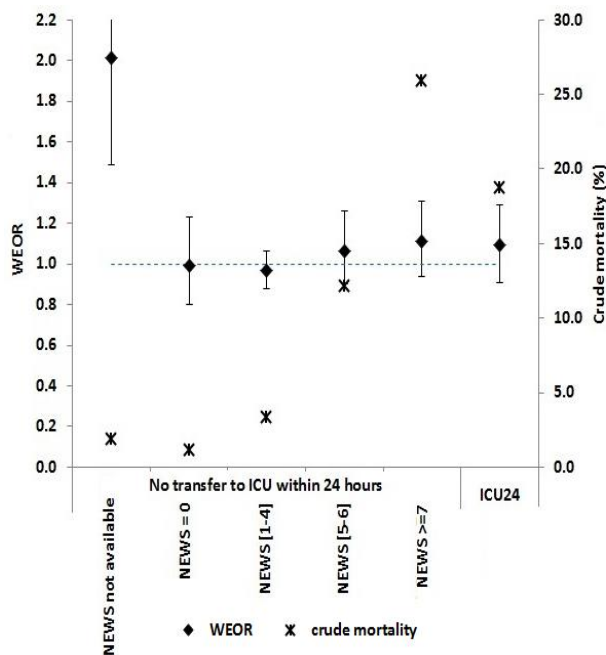

ESM Fig 4b: In-hospital weekend admission mortality odds ratios (± 95% CI), all patients and NEWS available: Impact of adjustment variables\*

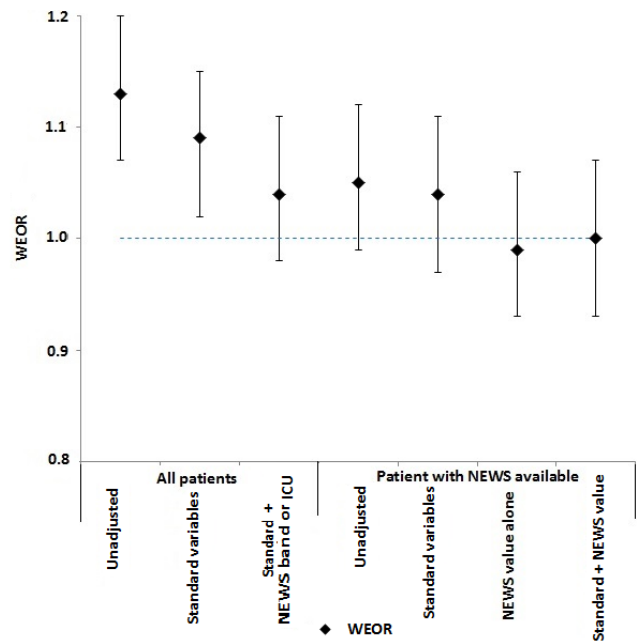

\*NEWS band or ICU is status within 24 hours post admission

ESM Fig 5: 30 days post admission survival

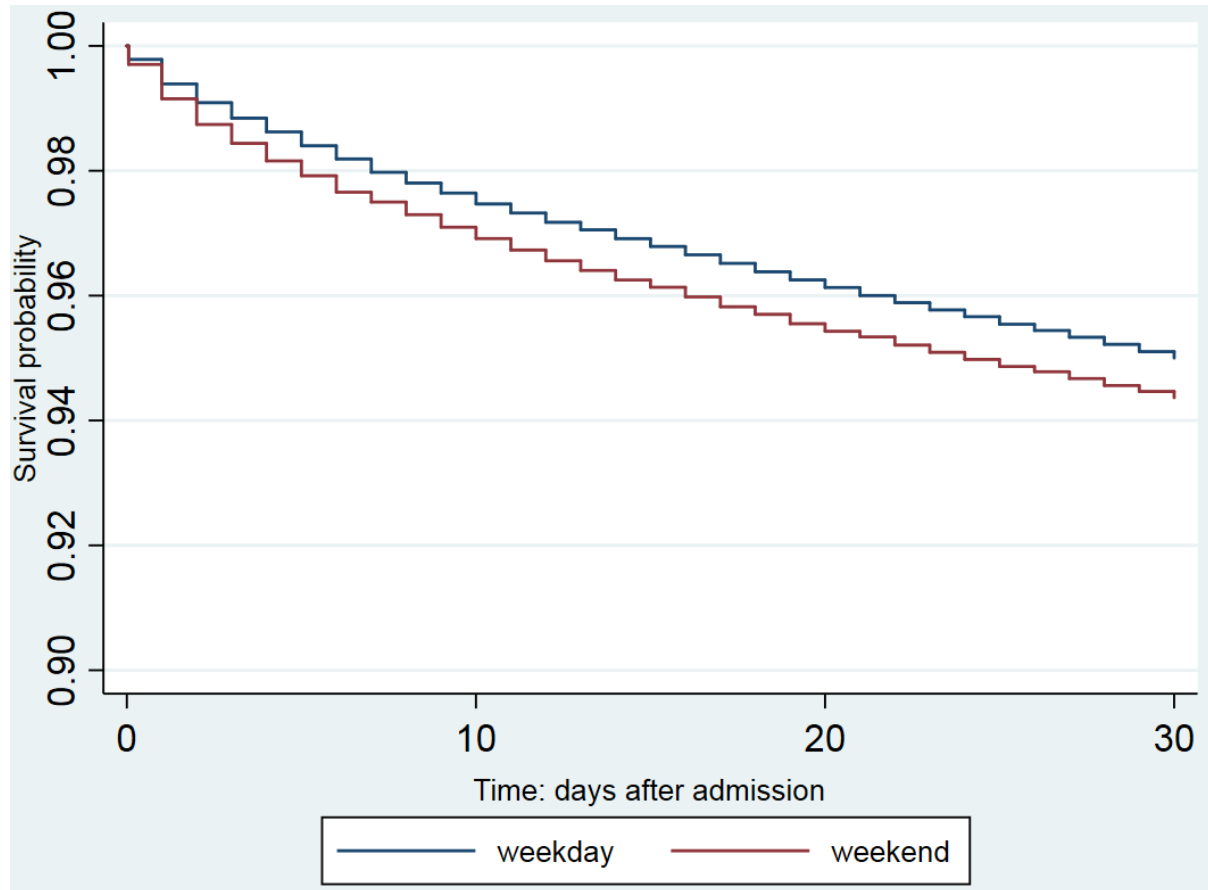

ESM Table 1. In-hospital crude mortality by weekend/weekday admission, stratified by ICU transfer and NEWS banding

| Admission group | Crude Mortality (%) |           |             |            |             |            | WEOR (95% CI)    |                  |
|-----------------|---------------------|-----------|-------------|------------|-------------|------------|------------------|------------------|
|                 | Weekend             |           | Weekday     |            | Total       |            |                  |                  |
| All Admissions  | 1752/37979          | 4.6%      | 5116/125149 | 4.1%       | 6868/163128 | 4.2%       | 1.13 (1.07-1.20) |                  |
| ICU24           | 291/1579            | 18.4%     | 713/3781    | 18.9%      | 1004/5360   | 18.7%      | 0.97 (0.84-1.13) |                  |
| Non ICU24       | NEWS >=7            | 347/1257  | 27.6%       | 917/3627   | 25.3%       | 1264/4884  | 25.9%            | 1.13 (0.98-1.30) |
|                 | NEWS [5-6]          | 270/2091  | 12.9%       | 714/6008   | 11.9%       | 984/8099   | 12.1%            | 1.10 (0.95-1.28) |
|                 | NEWS [1-4]          | 654/20535 | 3.2%        | 2212/66297 | 3.3%        | 2866/86832 | 3.3%             | 0.95 (0.87-1.04) |
|                 | NEWS = 0            | 116/10467 | 1.1%        | 384/34578  | 1.1%        | 500/45045  | 1.1%             | 1.00 (0.81-1.23) |
|                 | NEWS missing        | 74/2050   | 3.6%        | 176/10858  | 1.6%        | 250/12908  | 1.9%             | 2.27 (1.73-2.99) |

**ESM Table 2. In-hospital crude and adjusted weekend-to-weekday mortality odds ratios (WEOR).**

|                                              | Crude WEOR         | with Standard adjustment | Adjustment by NEWS* only                  | Standard adjustment + NEWS* |
|----------------------------------------------|--------------------|--------------------------|-------------------------------------------|-----------------------------|
| Admissions with NEWS available (N = 146,822) | 1.05 (0.99-1.12)   | 1.04 (0.97-1.11)         | 0.99 (0.93-1.06)                          | 1.00 (0.93-1.07)            |
| All Admissions (N = 163,128)                 | 1.13 (1.07-1.20) † | 1.08 (1.02-1.15)         | (Standard adjustment + ICU24/NEWS strata) | 1.04 (0.98-1.11)            |
| ICU24                                        | 0.97 (0.84-1.13) † | 1.08 (0.91-1.29)         |                                           |                             |
| Non ICU24                                    | NEWS >=7           | 1.13 (0.98-1.30) †       | 1.12 (0.95-1.32)                          |                             |
|                                              | NEWS [5-6]         | 1.10 (0.95-1.28) †       | 1.07 (0.90-1.26)                          |                             |
|                                              | NEWS [1-4]         | 0.95 (0.87-1.04) †       | 0.96 (0.88-1.06)                          |                             |
|                                              | NEWS = 0           | 1.00 (0.81-1.23) †       | 0.99 (0.80-1.23)                          |                             |
|                                              | NEWS missing       | 2.27 (1.73-2.99) †       | 1.98 (1.47-2.67)                          |                             |

\*NEWS included as an uncategorised covariate

†Values from Table 2.

ESM Table 3: Case characteristics – NEWS24 status, ICU24-NEWS24 status, Z-LOS and associated mortality

|                                                                                                 | Weekend |                          | Weekday |                           | Overall |                           | p_value           |
|-------------------------------------------------------------------------------------------------|---------|--------------------------|---------|---------------------------|---------|---------------------------|-------------------|
| <b>Total (average per day)</b>                                                                  | 37979   | (91)                     | 125149  | (120)                     | 163128  | (112)                     |                   |
| <b>NEWS24 status (%)</b>                                                                        |         |                          |         |                           |         |                           |                   |
| missing                                                                                         | 3146    | (8.3%)                   | 13160   | (10.5%)                   | 16306   | (10.0%)                   | <0.001            |
| available                                                                                       | 34833   | (91.7%)                  | 111989  | (89.5%)                   | 146822  | (90.0%)                   | <0.001            |
| <b>Availability of NEWS variables from time of hospital admission</b>                           |         |                          |         |                           |         |                           |                   |
| < 4 hours                                                                                       | 25871   | (74.30%)                 | 80605   | (72.00%)                  | 106476  | (72.50%)                  | <0.001            |
| < 6 hours                                                                                       | 27859   | (80.00%)                 | 87682   | (78.30%)                  | 115541  | (78.70%)                  | <0.001            |
| < 8 hours                                                                                       | 29185   | (83.80%)                 | 92488   | (82.60%)                  | 121673  | (82.90%)                  | <0.001            |
| < 12 hours                                                                                      | 30918   | (88.80%)                 | 98443   | (87.90%)                  | 129361  | (88.10%)                  | <0.001            |
| <b>ICU24 transfer cases (% of weekend/weekday total; % of the category; average per day)</b>    |         |                          |         |                           |         |                           |                   |
| NEWS 24 missing                                                                                 | 1096    | (69.4%; 34.8%;<br>2.6)   | 2302    | (60.9%;<br>17.5%; 2.2)    | 3398    | (63.4%;<br>20.8%; 2.3)    | <0.001;<br><0.001 |
| NEWS24 available                                                                                | 483     | (30.6%; 1.4%;<br>1.2)    | 1479    | (39.1%; 1.3%;<br>1.4)     | 1962    | (36.6%; 1.3%;<br>1.3)     | <0.001;<br>0.154  |
| Total                                                                                           | 1579    | (100.0%; 4.2%;<br>3.8)   | 3781    | (100.0%;<br>3.0%; 3.6)    | 5360    | (100.0%;<br>3.3%; 3.7)    | -- ;<br><0.001    |
| <b>No ICU24 transfer cases (% of weekend/weekday total; % of the category; average per day)</b> |         |                          |         |                           |         |                           |                   |
| NEWS 24 missing                                                                                 | 2050    | (5.6%; 65.2%;<br>4.9)    | 10858   | (8.9%; 82.5%;<br>10.4)    | 12908   | (8.2%; 79.2%;<br>8.8)     | <0.001;<br><0.001 |
| NEWS24 available                                                                                | 34350   | (94.4%; 98.6%;<br>82.4)  | 110510  | (91.1%;<br>98.7%; 105.9)  | 144860  | (91.8%;<br>98.7%; 99.2)   | <0.001;<br>0.154  |
| Total                                                                                           | 36400   | (100.0%;<br>95.8%; 87.3) | 121368  | (100.0%;<br>97.0%; 116.3) | 157768  | (100.0%;<br>96.7%; 108.0) | -- ;<br><0.001    |
| <b>by NEWS band or ICU ( % )</b>                                                                |         |                          |         |                           |         |                           |                   |
| ICU24                                                                                           | 1579    | (4.2%)                   | 3781    | (3.0%)                    | 5360    | (3.3%)                    | <0.001            |
| Non ICU24, NEWS>=7                                                                              | 1257    | (3.3%)                   | 3627    | (2.9%)                    | 4884    | (3.0%)                    | <0.001            |
| Non ICU24, NEWS [5-6]                                                                           | 2091    | (5.5%)                   | 6008    | (4.8%)                    | 8099    | (5.0%)                    | <0.001            |
| Non ICU24, NEWS [1-4]                                                                           | 20535   | (54.1%)                  | 66297   | (53.0%)                   | 86832   | (53.2%)                   | <0.001            |
| Non ICU24, NEWS = 0                                                                             | 10467   | (27.6%)                  | 34578   | (27.6%)                   | 45045   | (27.6%)                   | 1.000             |
| Non ICU24, NEWS missing                                                                         | 2050    | (5.4%)                   | 10858   | (8.7%)                    | 12908   | (7.9%)                    | <0.001            |
| <b>Z-LOS (%)</b>                                                                                |         |                          |         |                           |         |                           |                   |
| ICU24                                                                                           | 45      | (2.8%)                   | 92      | (2.4%)                    | 137     | (2.6%)                    | 0.394             |
| Non ICU24, NEWS>=7                                                                              | 64      | (5.1%)                   | 191     | (5.3%)                    | 255     | (5.2%)                    | 0.784             |
| Non ICU24, NEWS [5-6]                                                                           | 116     | (5.5%)                   | 351     | (5.8%)                    | 467     | (5.8%)                    | 0.611             |
| Non ICU24, NEWS [1-4]                                                                           | 3073    | (15.0%)                  | 11222   | (16.9%)                   | 14295   | (16.5%)                   | <0.001            |
| Non ICU24, NEWS = 0                                                                             | 1952    | (18.6%)                  | 7652    | (22.1%)                   | 9604    | (21.3%)                   | <0.001            |
| Non ICU24, NEWS missing                                                                         | 1279    | (62.4%)                  | 7882    | (72.6%)                   | 9161    | (71.0%)                   | <0.001            |
| Total                                                                                           | 6529    | (17.2%)                  | 27390   | (21.9%)                   | 33919   | (20.8%)                   | <0.001            |
| <b>Died at discharge of Z-LOS cases (%)</b>                                                     |         |                          |         |                           |         |                           |                   |
| ICU24                                                                                           | 31      | (68.9%)                  | 68      | (73.9%)                   | 99      | (72.3%)                   | 0.539             |
| Non ICU24, NEWS>=7                                                                              | 41      | (64.1%)                  | 77      | (40.3%)                   | 118     | (46.3%)                   | 0.001             |
| Non ICU24, NEWS [5-6]                                                                           | 8       | (6.9%)                   | 15      | (4.3%)                    | 23      | (4.9%)                    | 0.263             |

|                                                                                               |      |               |      |               |      |               |                   |
|-----------------------------------------------------------------------------------------------|------|---------------|------|---------------|------|---------------|-------------------|
| Non ICU24, NEWS [1-4]                                                                         | 2    | (0.1%)        | 22   | (0.2%)        | 24   | (0.2%)        | 0.247             |
| Non ICU24, NEWS = 0                                                                           | 3    | (0.2%)        | 4    | (0.1%)        | 7    | (0.1%)        | 0.255             |
| Non ICU24, NEWS missing                                                                       | 28   | (2.2%)        | 73   | (0.9%)        | 101  | (1.1%)        | <0.001            |
| Total                                                                                         | 113  | (1.7%)        | 259  | (0.9%)        | 372  | (1.1%)        | <0.001            |
| <b>Direct /Indirect ICU*** (% of weekend/weekday total; % of weekend/weekday ICU24 cases)</b> |      |               |      |               |      |               |                   |
| direct ITU                                                                                    | 1202 | (3.2%; 76.1%) | 2469 | (2.0%; 65.3%) | 3671 | (2.3%; 68.5%) | <0.001;<br><0.001 |
| indirect ITU                                                                                  | 377  | (1.0%; 23.9%) | 1312 | (1.0%; 34.7%) | 1689 | (1.0%; 31.5%) | 0.348;<br><0.001  |
| <b>Indirect ICU by NEWS status</b>                                                            |      |               |      |               |      |               |                   |
| News available                                                                                | 303  | (80.4%)       | 1052 | (80.2%)       | 1355 | (80.2%)       | 0.078             |
| NEWS unavailable                                                                              | 74   | (19.6%)       | 260  | (19.8%)       | 334  | (19.8%)       | 0.078             |
| <b>Direct ICU by NEWS status</b>                                                              |      |               |      |               |      |               |                   |
| News available                                                                                | 180  | (15.0%)       | 427  | (17.3%)       | 607  | (16.5%)       | 0.078             |
| NEWS unavailable                                                                              | 1022 | (85.0%)       | 2042 | (82.7%)       | 3064 | (83.5%)       | 0.078             |

**ESM Table 4: Subgroup characteristics stratified by ICU and NEWS status within 24 hours post admission**

|                                           | <b>Weekend</b> | <b>Weekday</b> | <b>Overall</b> | <b>p_value*</b> |
|-------------------------------------------|----------------|----------------|----------------|-----------------|
| Total (average per day)                   | 37979 (91)     | 125149 (120)   | 163128 (112)   |                 |
| <b>Age (years, median (IQR))</b>          |                |                |                |                 |
| No ICU24, NEWS missing                    | 51 (34-67)     | 53 (37-69)     | 53 (36-69)     | <0.001          |
| No ICU24, NEWS = 0                        | 56 (37-76)     | 57 (39-74)     | 57 (39-74)     | 0.541           |
| No ICU24, NEWS [1-4]                      | 61 (41-78)     | 62 (43-78)     | 61 (42-78)     | 0.083           |
| No ICU24, NEWS [5-6]                      | 73 (56-83)     | 71 (56-83)     | 71 (56-83)     | 0.125           |
| No ICU24, NEWS >=7                        | 75 (62-84)     | 74 (62-84)     | 74 (62-84)     | 0.316           |
| ICU24                                     | 50 (33-66)     | 54 (39-67)     | 54 (37-67)     | <0.001          |
| <b>Age (years, mean (SD))</b>             |                |                |                |                 |
| No ICU24, NEWS missing                    | 51.2 (20.296)  | 53.4 (20.116)  | 53.1 (20.160)  | 0.000           |
| No ICU24, NEWS = 0                        | 56.0 (22.309)  | 56.2 (21.261)  | 56.2 (21.509)  | 0.462           |
| No ICU24, NEWS [1-4]                      | 58.9 (22.350)  | 59.2 (21.632)  | 59.2 (21.805)  | 0.018           |
| No ICU24, NEWS [5-6]                      | 68.0 (19.592)  | 67.5 (19.065)  | 67.7 (19.202)  | 0.361           |
| No ICU24, NEWS >=7                        | 71.3 (17.285)  | 70.8 (17.308)  | 71.0 (17.301)  | 0.376           |
| ICU24                                     | 50.3 (19.815)  | 53.3 (18.616)  | 52.4 (19.024)  | <0.001          |
| <b>Sex (male (%))</b>                     |                |                |                |                 |
| No ICU24, NEWS missing                    | 1063 (51.8%)   | 5108 (47.0%)   | 6171 (47.8%)   | <0.001          |
| No ICU24, NEWS = 0                        | 5464 (52.2%)   | 17670 (51.1%)  | 23134 (51.4%)  | 0.008           |
| No ICU24, NEWS [1-4]                      | 10190 (49.6%)  | 32664 (49.3%)  | 42854 (49.4%)  | 0.395           |
| No ICU24, NEWS [5-6]                      | 1005 (48.0%)   | 2877 (47.9%)   | 3882 (47.9%)   | 0.679           |
| No ICU24, NEWS >=7                        | 634 (50.4%)    | 1681 (46.4%)   | 2315 (47.4%)   | 0.000           |
| ICU24                                     | 1004 (63.6%)   | 2375 (62.8%)   | 3379 (63.0%)   | 0.053           |
| <b>Length of stay (days median (IQR))</b> |                |                |                |                 |
| No ICU24, NEWS missing                    | 0 (0-1)        | 0 (0-1)        | 0 (0-1)        | <0.001          |
| No ICU24, NEWS = 0                        | 2 (1-5)        | 2 (1-5)        | 2 (1-5)        | 0.001           |
| No ICU24, NEWS [1-4]                      | 3 (1-8)        | 3 (1-8)        | 3 (1-8)        | 0.437           |
| No ICU24, NEWS [5-6]                      | 6 (2-13)       | 6 (2-14)       | 6 (2-14)       | 0.167           |
| No ICU24, NEWS >=7                        | 6 (3-13)       | 7 (3-14)       | 7 (3-14)       | 0.012           |
| ICU24                                     | 11 (5-23)      | 11 (6-24)      | 11 (6-24)      | 0.875           |
| <b>Length of stay (days, mean (SD))</b>   |                |                |                |                 |
| No ICU24, NEWS missing                    | 1.8 (6.515)    | 1.2 (5.373)    | 1.3 (5.574)    | <0.001          |
| No ICU24, NEWS = 0                        | 5.2 (10.341)   | 5.3 (10.767)   | 5.3 (10.670)   | 0.573           |
| No ICU24, NEWS [1-4]                      | 7.1 (12.983)   | 7.3 (12.982)   | 7.2 (12.982)   | 0.200           |
| No ICU24, NEWS [5-6]                      | 10.7 (14.385)  | 11.6 (16.657)  | 11.3 (16.105)  | 0.035           |
| No ICU24, NEWS >=7                        | 10.5 (13.257)  | 12.0 (15.925)  | 11.6 (15.295)  | 0.004           |
| ICU24                                     | 19.0 (23.445)  | 19.8 (26.172)  | 19.5 (25.399)  | 0.334           |
| <b>Charlson Index (%)</b>                 |                |                |                |                 |
| <b>No ICU24, NEWS missing</b>             |                |                |                |                 |
| 0                                         | 1273 (62.1%)   | 7029 (64.7%)   | 8302 (64.3%)   | 0.022           |
| 1-5                                       | 322 (15.7%)    | 1725 (15.9%)   | 2047 (15.9%)   | 0.838           |
| >5                                        | 455 (22.2%)    | 2104 (19.4%)   | 2559 (19.8%)   | 0.003           |
| <b>No ICU24, NEWS = 0</b>                 |                |                |                |                 |
| 0                                         | 5926 (56.6%)   | 19550 (56.5%)  | 25476 (56.6%)  | 0.885           |
| 1-5                                       | 1747 (16.7%)   | 5701 (16.5%)   | 7448 (16.5%)   | 0.629           |
| >5                                        | 2794 (26.7%)   | 9327 (27.0%)   | 12121 (26.9%)  | 0.571           |
| <b>No ICU24, NEWS [1-4]</b>               |                |                |                |                 |
| 0                                         | 9630 (46.9%)   | 30480 (46.0%)  | 40110 (46.2%)  | 0.020           |
| 1-5                                       | 3714 (18.1%)   | 11699 (17.7%)  | 15413 (17.8%)  | 0.149           |
| >5                                        | 7191 (35.0%)   | 24118 (36.4%)  | 31309 (36.1%)  | <0.001          |
| <b>No ICU24, NEWS [5-6]</b>               |                |                |                |                 |
| 0                                         | 629 (30.1%)    | 1722 (28.7%)   | 2351 (29.0%)   | 0.218           |
| 1-5                                       | 409 (19.6%)    | 1222 (20.3%)   | 1631 (20.1%)   | 0.444           |
| >5                                        | 1053 (50.4%)   | 3064 (51.0%)   | 4117 (50.8%)   | 0.614           |
| <b>No ICU24, NEWS &gt;=7</b>              |                |                |                |                 |
| 0                                         | 315 (25.1%)    | 826 (22.8%)    | 1141 (23.4%)   | 0.098           |
| 1-5                                       | 285 (22.7%)    | 729 (20.1%)    | 1014 (20.8%)   | 0.053           |
| >5                                        | 657 (52.3%)    | 2072 (57.1%)   | 2729 (55.9%)   | 0.003           |
| <b>ICU24</b>                              |                |                |                |                 |
| 0                                         | 853 (54.0%)    | 1786 (47.2%)   | 2639 (49.2%)   | <0.001          |
| 1-5                                       | 239 (15.1%)    | 570 (15.1%)    | 809 (15.1%)    | 0.955           |
| >5                                        | 487 (30.8%)    | 1425 (37.7%)   | 1912 (35.7%)   | <0.001          |
